# Supplementary material
Source: ML conference proceedings conference paper supplement (https://www.ecva.net/papers/eccv_2020/papers_ECCV/html/123480052_ECCV_2020_paper.php)
Supplement: Supplementary file 1 [file 123480052-supp.pdf]

## Appendix to Increasing the robustness of DNNs against image corruptions by playing the Game of Noise

### A Architectures of the noise generators

The architectures of the noise generators are displayed in Tables 1 and 2. The number of color channels is indicated by  $C$ . The noise generator displayed in Table 1 only uses kernels with a size of 1 and thus produces spatially uncorrelated noise. With the stride being 1 and no padding, the spatial dimensions are preserved in each layer. The noise generator displayed in Table 2 has one layer with 3x3 convolutions and thus produces noise samples with a correlation length of 3x3 pixels.

| Layer       | Shape                  |
|-------------|------------------------|
| Conv + ReLU | $20 \times 1 \times 1$ |
| Conv + ReLU | $20 \times 1 \times 1$ |
| Conv + ReLU | $20 \times 1 \times 1$ |
| Conv        | $C \times 1 \times 1$  |

Table 1: Architecture of the noise generator producing uncorrelated noise.

| Layer       | Shape                  |
|-------------|------------------------|
| Conv + ReLU | $20 \times 1 \times 1$ |
| Conv + ReLU | $20 \times 3 \times 3$ |
| Conv + ReLU | $20 \times 1 \times 1$ |
| Conv        | $C \times 1 \times 1$  |

Table 2: Architecture of the noise generator producing locally correlated noise.

### B Implementation details and hyper-parameters

We use PyTorch [7] for all of our experiments.

*Preprocessing* MNIST images are preprocessed such that their pixel values lie in the range  $[0, 1]$ . Preprocessing for ImageNet is performed in the standard way for PyTorch ImageNet models from the model zoo by subtracting the mean  $[0.485, 0.456, 0.406]$  and dividing by the standard deviation  $[0.229, 0.224, 0.225]$ . We add Gaussian, adversarial and Speckle noise before the preprocessing step, so the noisy images are first clipped to the range  $[0, 1]$  of the raw images and then preprocessed before being fed into the model.

**ImageNet experiments** For all ImageNet experiments, we used a pretrained ResNet50 architecture from <https://pytorch.org/docs/stable/torchvision/models.html>. We fine-tuned the model with SGD-M using an initial learning rate of 0.001, which corresponds to the last learning rate of the PyTorch model training, and a momentum of 0.9. After convergence, we decayed the learning rate once by a factor of 10 and continued the training. Decaying the learning rate was highly beneficial for the model performance. We tried decaying the learning rate a second time, but this did not bring any benefits in any of our experiments. For GNT, we also tried training from scratch, i.e. starting with a large learning rate of 0.1 and random weights, and trained for 120 epochs, but we got worse results compared to merely fine-tuning the model provided by torchvision. We used a batch size of 70 for all our experiments. We have also tried to use the batch sizes 50 and 100, but did not observe any difference.

*Gaussian noise* We trained the models until convergence. The total number of training epochs varied between 30 and 90 epochs.

*Speckle noise* We used the Speckle noise implementation from [https://github.com/hendrycks/robustness/blob/master/ImageNet-C/create\\_c/make\\_imagenet\\_c.py](https://github.com/hendrycks/robustness/blob/master/ImageNet-C/create_c/make_imagenet_c.py), line 270. The model trained with Speckle noise converged faster than with Gaussian data augmentation and therefore, we only trained the model for 10 epochs.

*Adversarial Noise Training* The adversarial noise generator was trained with the Adam optimizer with a learning rate of 0.0001. We have replaced the noise generator every 0.33 epochs. For  $\text{ANT}^{1 \times 1}$ , we set the  $\epsilon$ -sphere to control the size of the perturbation to 135.0 which on average corresponds to the  $\ell_2$ -size of a perturbation caused by additive Gaussian noise sampled from  $\mathcal{N}(0, 0.5^2 \cdot \mathbf{1})$ . We have trained the classifier until convergence for 80 epochs. For  $\text{ANT}^{3 \times 3}$ , we set the  $\epsilon$ -sphere to 70.0 and trained the classifier for 80 epochs. We decreased the  $\epsilon$ -sphere for  $\text{ANT}^{3 \times 3}$  to counteract giving the noise generator more degrees of freedom to fool the classifier to maintain a similar training losses and accuracies for  $\text{ANT}^{1 \times 1}$  and  $\text{ANT}^{3 \times 3}$ .

**MNIST experiments** For the MNIST experiments, we used the same model architecture as [6] for our  $\text{ANT}^{1 \times 1}$  and GNT. For  $\text{ANT}^{1 \times 1}$ , our learning rate for the generator was between  $10^{-4}$  and  $10^{-5}$ , and equal to  $10^{-3}$  for the classifier. We used a batch size of 300. As an optimizer, we used SGD-M with a momentum of 0.9 for the classifier and Adam [5] for the generator. The splitting of batches in clean, noisy and history was equivalent to the ImageNet experiments. The optimal  $\epsilon$  hyper-parameter was determined with a line search similar to the optimal  $\sigma$  of the Gaussian noise; we found  $\epsilon = 10$  to be optimal. The parameters for the Gaussian noise experiments were equivalent. Both models were trained until convergence (around 500-600 epochs). GNT and  $\text{ANT}^{1 \times 1}$  were performed on a pretrained network.

## C Detailed results on the evaluation of corruption robustness due to regular adversarial training

We find that standard adversarial training against minimal adversarial perturbations in general does not increase robustness against common corruptions. While some early results on CIFAR-10 by [1] and Tiny ImageNet-C by [3] suggest that standard adversarial training might increase robustness to common corruptions, we here observe the opposite: Adversarially trained models have lower robustness against common corruptions. An adversarially trained ResNet152 with an additional denoising layer<sup>1</sup> from [12] has lower accuracy across almost all corruptions except Snow and Pixelations. On some corruptions, the accuracy of the adversarially trained model decreases drastically, e.g. from 49.1% to 4.6% on Fog or 42.8% to 9.3% on Contrast. Similarly, the adversarially trained ResNet50<sup>2</sup> from [Shafahi et al., 2019] shows a substantial decrease in performance on common corruptions compared with a vanilla trained model.

An evaluation of a robustified version of AlexNet<sup>2</sup> [10] that was trained with the Universal Adversarial Training scheme on ImageNet-C shows that achieving robustness against universal adversarial perturbations does not noticeably increase robustness towards common corruptions (22.2%) compared with a vanilla trained model (21.1%).

<sup>1</sup> Model weights from <https://github.com/facebookresearch/ImageNet-Adversarial-Training>

<sup>2</sup> Model weights were kindly provided by the authors.

| Model           | All  | Noise (Compressed) |      |         | Blur (Compressed) |       |        |      |
|-----------------|------|--------------------|------|---------|-------------------|-------|--------|------|
|                 |      | Gaussian           | Shot | Impulse | Defocus           | Glass | Motion | Zoom |
| Vanilla RN50    | 39.2 | 29.3               | 27.0 | 23.8    | 38.7              | 26.8  | 38.7   | 36.2 |
| AT [9]          | 29.1 | 20.5               | 19.1 | 12.4    | 21.4              | 30.8  | 30.4   | 31.4 |
| Vanilla RN152   | 45.0 | 35.7               | 34.3 | 29.6    | 45.1              | 32.8  | 48.4   | 40.5 |
| AT [12]         | 35.0 | 35.2               | 34.4 | 24.8    | 22.1              | 31.7  | 30.9   | 32.0 |
| Vanilla AlexNet | 21.1 | 11.4               | 10.6 | 7.7     | 18.0              | 17.4  | 21.4   | 20.2 |
| UAT [10]        | 22.2 | 20.1               | 19.1 | 16.2    | 13.1              | 21.6  | 19.7   | 19.2 |

| Model           | Weather (Compressed) |       |      |            | Digital (Compressed) |         |          |      |
|-----------------|----------------------|-------|------|------------|----------------------|---------|----------|------|
|                 | Snow                 | Frost | Fog  | Brightness | Contrast             | Elastic | Pixelate | JPEG |
| Vanilla RN50    | 32.5                 | 38.1  | 45.8 | 68.0       | 39.1                 | 45.2    | 44.8     | 53.4 |
| AT [9]          | 24.4                 | 25.6  | 5.8  | 51.1       | 7.8                  | 45.4    | 53.4     | 56.3 |
| Vanilla RN152   | 38.7                 | 43.9  | 49.1 | 71.2       | 42.8                 | 51.1    | 50.5     | 60.5 |
| AT [12]         | 42.0                 | 40.4  | 4.6  | 58.8       | 9.3                  | 47.2    | 54.1     | 58.0 |
| Vanilla AlexNet | 13.3                 | 17.3  | 18.1 | 43.5       | 14.7                 | 35.4    | 28.2     | 39.4 |
| UAT [10]        | 13.8                 | 18.3  | 4.3  | 36.5       | 4.8                  | 36.8    | 42.3     | 47.1 |

Table 3: Average Top-1 accuracy over 5 severities of common corruptions on ImageNet-C in percent. A high accuracy on a certain corruption type indicates high robustness of a classifier on this corruption type, so higher accuracy is better. Adversarial training (AT) decreases the accuracy on common corruptions, especially on the corruptions Fog and Contrast. Universal Adversarial Training (UAT) slightly increases the overall performance.

## D Detailed ImageNet-C results

We show detailed results on individual corruptions in Table 4 in accuracy and in Table 5 in mCE for differently trained models. In Fig. 1, we show the degradation of accuracy for different severity levels. To avoid clutter, we only show results for a vanilla trained model, for the previous state of the art SIN+IN [2], for several Gaussian trained models and for the overall best model ANT<sup>3x3</sup>+SIN.

The Corruption Error [3] is defined as

$$\text{CE}_c^f = \left( \sum_{s=1}^5 E_{s,c}^f \right) / \left( \sum_{s=1}^5 E_{s,c}^{\text{AlexNet}} \right), \quad (1)$$

where  $E_{s,c}^f$  is the Top-1 error of a classifier  $f$  for a corruption  $c$  with severity  $s$ . The mean Corruption error (mCE) is taken by averaging over all corruptions.

| model                     | mean      | Noise     |           |           |  | Blur      |           |           |           | Weather   |           |           |           | Digital   |           |           |           |
|---------------------------|-----------|-----------|-----------|-----------|--|-----------|-----------|-----------|-----------|-----------|-----------|-----------|-----------|-----------|-----------|-----------|-----------|
|                           |           | Gauss     | Shot      | Impulse   |  | Defocus   | Glass     | Motion    | Zoom      | Snow      | Frost     | Fog       | Bright    | Contrast  | Elastic   | Pixel     | Jpeg      |
| Vanilla RN50              | 39        | 29        | 27        | 24        |  | 39        | 27        | 39        | 36        | 33        | 38        | 46        | 68        | 39        | 45        | 45        | 53        |
| Shift Inv                 | 42        | 36        | 34        | 30        |  | 40        | 29        | 38        | 39        | 33        | 40        | 48        | 68        | 42        | 45        | 49        | 57        |
| Patch GN                  | 44        | 45        | 43        | 42        |  | 38        | 26        | 39        | 38        | 30        | 39        | 54        | 67        | 39        | 52        | 47        | 56        |
| SIN+IN                    | 45        | 41        | 40        | 37        |  | 43        | 32        | 45        | 36        | 41        | 42        | 47        | 67        | 43        | 50        | 56        | 58        |
| AugMix                    | 48        | 41        | 41        | 38        |  | <b>48</b> | 35        | <b>54</b> | <b>49</b> | 40        | 44        | 47        | 69        | <b>51</b> | 52        | 57        | 60        |
| Speckle                   | 46        | 55        | 58        | 49        |  | 43        | 32        | 40        | 36        | 34        | 41        | 46        | 68        | 41        | 47        | 49        | 58        |
| GNT <sub>mult</sub>       | 49        | <b>67</b> | 65        | <b>64</b> |  | 43        | 33        | 41        | 37        | 34        | 42        | 45        | 68        | 41        | 48        | 50        | 60        |
| GNT <sub>σ0.5</sub>       | 49        | 58        | 59        | 57        |  | 47        | 38        | 43        | 42        | 35        | 44        | 44        | 68        | 39        | 50        | 55        | <b>62</b> |
| ANT <sup>1x1</sup>        | 51        | 65        | <b>66</b> | <b>64</b> |  | 47        | 37        | 43        | 40        | 36        | 46        | 44        | <b>70</b> | 43        | 49        | 55        | <b>62</b> |
| ANT <sup>1x1</sup> +SIN   | 52        | 64        | 65        | 63        |  | 46        | 38        | 46        | 39        | 42        | 47        | 49        | 69        | 47        | 50        | 57        | 60        |
| ANT <sup>1x1</sup> w/o EP | 49        | 59        | 59        | 57        |  | 46        | 37        | 43        | 40        | 34        | 43        | 43        | 68        | 39        | 49        | 55        | 61        |
| ANT <sup>3x3</sup>        | 50        | 65        | 64        | <b>64</b> |  | 44        | 36        | 42        | 38        | 39        | 46        | 44        | 69        | 41        | 49        | 55        | 61        |
| ANT <sup>3x3</sup> +SIN   | <b>53</b> | 62        | 61        | 60        |  | 41        | <b>39</b> | 46        | 37        | <b>48</b> | <b>52</b> | <b>55</b> | 68        | 49        | <b>53</b> | <b>59</b> | 59        |

Table 4: Average Top-1 accuracy over 5 severities of common corruptions on ImageNet-C in percent obtained by different models; higher is better.

## E MNIST-C results

Similar to the ImageNet-C experiments, we are interested how vanilla, adversarially and noise trained models perform on MNIST-C.

The adversarially robust MNIST model by [11] was trained with a robust loss function and is among the state of the art in certified adversarial robustness. The other baseline models were trained with Adversarial Training in  $\ell_2$  (DDN) by [8] and  $\ell_\infty$  (PGD) by [6]. Our GNT and ANT<sup>1x1</sup> trained versions are trained as described in the main paper and Appendix B.2. The results are shown in Table 6. Similar to ImageNet-C, the models trained with GNT and ANT<sup>1x1</sup> are significantly better than our vanilla trained baseline. Also, regular adversarial training has severe drops and does not lead to significant robustness improvements.

As for ImageNet and GNT, we have treated  $\sigma$  as a hyper-parameter. The accuracy on MNIST-C for different values of  $\sigma$  is displayed in Fig. 2 and has a maximum around  $\sigma = 0.5$  like for ImageNet.

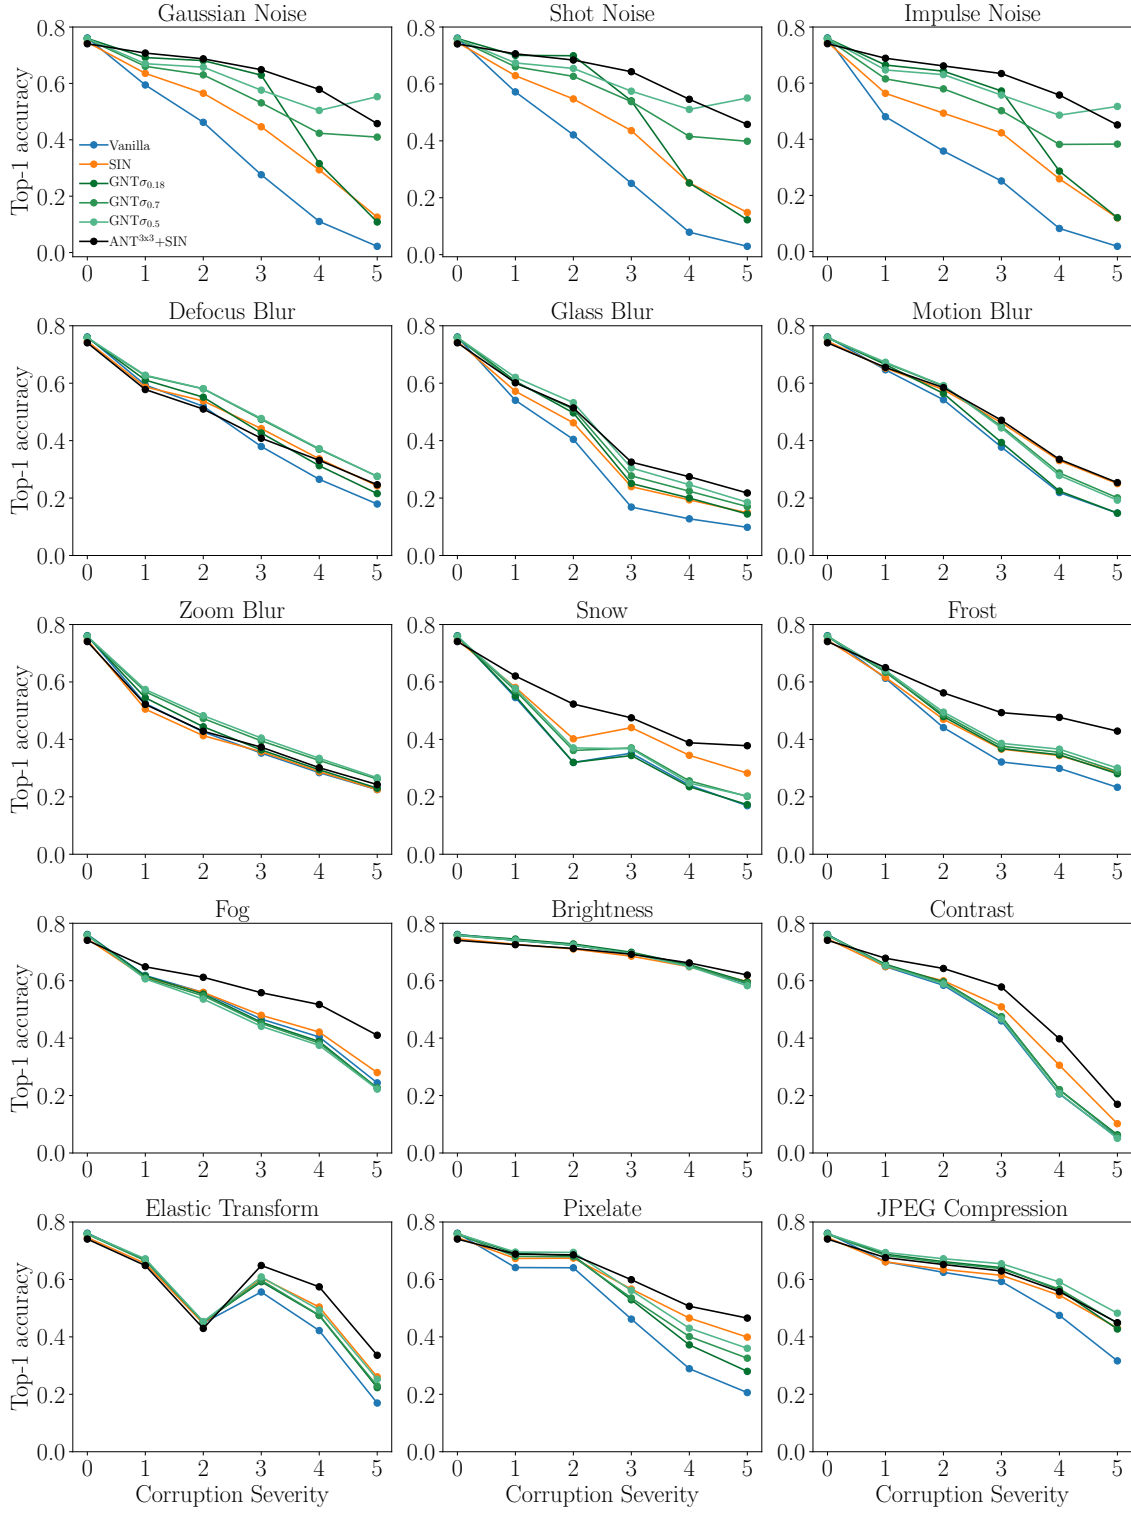

Fig. 1: Top-1 accuracy for each corruption type and severity on ImageNet-C.

| model                     | mCE       | Noise     |           |           | Blur      |           |           |           | Weather   |           |           |           | Digital   |           |           |           |
|---------------------------|-----------|-----------|-----------|-----------|-----------|-----------|-----------|-----------|-----------|-----------|-----------|-----------|-----------|-----------|-----------|-----------|
|                           |           | Gauss     | Shot      | Impulse   | Defocus   | Glass     | Motion    | Zoom      | Snow      | Frost     | Fog       | Bright    | Contrast  | Elastic   | Pixel     | Jpeg      |
| Vanilla                   | 77        | 80        | 82        | 83        | 75        | 89        | 78        | 80        | 78        | 75        | 66        | 57        | 71        | 85        | 77        | 77        |
| SIN                       | 69        | 66        | 67        | 68        | 70        | 82        | 69        | 80        | 68        | 71        | 65        | 58        | 66        | 78        | 62        | 70        |
| Patch GN                  | 71        | 62        | 63        | 62        | 75        | 90        | 78        | 78        | 81        | 74        | 57        | 59        | 71        | 74        | 74        | 72        |
| Shift Inv.                | 73        | 73        | 74        | 76        | 74        | 86        | 78        | 77        | 77        | 72        | 63        | 56        | 68        | 86        | 71        | 71        |
| AugMix                    | 65        | 67        | 66        | 68        | <b>64</b> | 79        | <b>59</b> | <b>64</b> | 69        | 68        | 65        | 54        | <b>57</b> | 74        | 60        | 65        |
| Speckle                   | 68        | 51        | 47        | 55        | 70        | 83        | 77        | 80        | 76        | 71        | 66        | 57        | 70        | 82        | 71        | 69        |
| GNT <sub>mult</sub>       | 65        | <b>37</b> | 39        | <b>39</b> | 69        | 81        | 76        | 79        | 76        | 70        | 67        | 56        | 69        | 81        | 69        | 66        |
| GNT $\sigma_{0.5}$        | 64        | 46        | 46        | 47        | 65        | 75        | 72        | 74        | 75        | 68        | 69        | 57        | 71        | 78        | 63        | 63        |
| ANT <sup>1x1</sup>        | 62        | 39        | <b>38</b> | <b>39</b> | 65        | 77        | 72        | 75        | 74        | 66        | 68        | <b>53</b> | 67        | 78        | 62        | <b>62</b> |
| ANT <sup>1x1</sup> +SIN   | <b>61</b> | 40        | 39        | 40        | 65        | 76        | 69        | 76        | 67        | 64        | 62        | 55        | 63        | 77        | 59        | 66        |
| ANT <sup>1x1</sup> w/o EP | 65        | 46        | 46        | 47        | 66        | 76        | 73        | 75        | 76        | 69        | 70        | 57        | 72        | 79        | 63        | 64        |
| ANT <sup>3x3</sup>        | 63        | 39        | 40        | <b>39</b> | 68        | 78        | 73        | 77        | 71        | 66        | 68        | 55        | 69        | 79        | 63        | 64        |
| ANT <sup>3x3</sup> +SIN   | <b>61</b> | 43        | 44        | 43        | 71        | <b>74</b> | 69        | 79        | <b>60</b> | <b>58</b> | <b>55</b> | 56        | 59        | <b>73</b> | <b>57</b> | 67        |

Table 5: Average mean Corruption Error (mCE) obtained by different models on common corruptions from ImageNet-C; lower is better.

| model              | clean acc |      | mean | Shot | Impulse | Glass Blur | Motion Blur | Shear | Scale | Rotate | Brightness | Translate | Stripe | Fog | Splatter | Dotted Line | Zig Zag | Canny Edges |
|--------------------|-----------|------|------|------|---------|------------|-------------|-------|-------|--------|------------|-----------|--------|-----|----------|-------------|---------|-------------|
| Vanilla            | 99.1      | 86.9 |      | 98   | 96      | 96         | 94          | 98    | 95    | 92     | 88         | 57        | 88     | 50  | 97       | 96          | 86      | 72          |
| [6]                | 98.5      | 75.6 |      | 98   | 55      | 94         | 94          | 97    | 88    | 92     | 27         | 53        | 40     | 63  | 96       | 78          | 74      | 84          |
| Vanilla            | 98.8      | 74.3 |      | 98   | 91      | 96         | 88          | 95    | 80    | 89     | 34         | 45        | 41     | 23  | 96       | 96          | 80      | 63          |
| [11]               | 98.2      | 68.6 |      | 97   | 65      | 93         | 93          | 94    | 87    | 89     | 11         | 40        | 20     | 25  | 96       | 89          | 61      | 68          |
| Vanilla            | 99.5      | 89.8 |      | 98   | 96      | 95         | 97          | 98    | 96    | 94     | 95         | 61        | 89     | 79  | 98       | 98          | 90      | 63          |
| DDN Tr [8]         | 99.0      | 87.0 |      | 99   | 97      | 96         | 94          | 98    | 91    | 93     | 72         | 55        | 92     | 64  | 99       | 98          | 91      | 66          |
| Vanilla            | 99.1      | 86.9 |      | 98   | 96      | 96         | 94          | 98    | 95    | 92     | 88         | 57        | 88     | 50  | 97       | 96          | 86      | 72          |
| GNT $\sigma_{0.5}$ | 99.3      | 92.4 |      | 99   | 99      | 98         | 97          | 98    | 95    | 93     | 98         | 56        | 91     | 91  | 99       | 99          | 96      | 78          |
| ANT <sup>1x1</sup> | 99.4      | 92.4 |      | 99   | 99      | 98         | 97          | 98    | 95    | 93     | 98         | 55        | 89     | 91  | 99       | 99          | 96      | 80          |

Table 6: Accuracy in percent for the MNIST-C dataset for adversarially robust ([11], [6], DDN [8]) and our noise trained models (GNT and ANT<sup>1x1</sup>). Vanilla always denotes the same network architecture as its adversarially or noise trained counterpart but with standard training. Note that we used the same network architecture as [6].

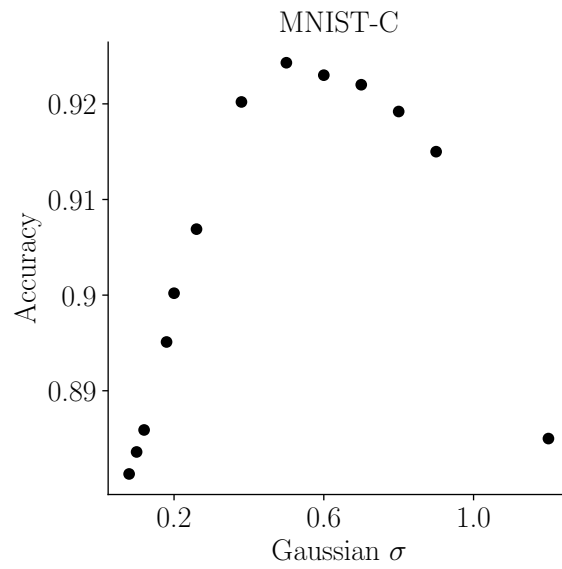

Fig. 2: Average accuracy on MNIST-C over all severities and corruptions for different values of sigma  $\sigma$  of the Gaussian noise training (GNT) during training. Each point corresponds to one converged training.

## F Evaluation of adversarial robustness of models trained via GNT and ANT<sup>1x1</sup>

*ImageNet* To evaluate adversarial robustness on ImageNet, we used PGD [6] and DDN [8]. For the  $\ell_\infty$  PGD attack, we allowed for 200 iterations with a step size of 0.0001 and a maximum sphere size of 0.001. For the DDN  $\ell_2$  attack, we also allowed for 200 iterations, set the sphere adjustment parameter  $\gamma$  to 0.02 and the maximum epsilon to 0.125. We note that for both attacks increasing the number of iterations from 100 to 200 did not make a significant difference in robustness of our tested models. The results on adversarial robustness on ImageNet can be found in the main paper in Table 4.

*MNIST* To evaluate adversarial robustness on MNIST, we also used PGD [6] and DDN [8]. For the  $\ell_\infty$  PGD attack, we allowed for 100 iterations with a step size of 0.01 and a maximum sphere size of 0.1. For the DDN  $\ell_2$  attack, we also allowed for 100 iterations, set the sphere adjustment parameter  $\gamma$  to 0.05 and the maximum epsilon to 1.5. All models have the same architecture as [6]. The results on adversarial robustness on MNIST can be found in Table 7.

| model              | clean acc. [%] | $\ell_2$ acc. [%] | $\ell_\infty$ acc. [%] |
|--------------------|----------------|-------------------|------------------------|
| Vanilla            | 99.1           | 73.2              | 55.8                   |
| GNT $\sigma_{0.5}$ | 99.3           | 89.2              | 73.6                   |
| ANT <sup>1x1</sup> | 99.4           | 90.4              | 76.3                   |

Table 7: Adversarial robustness on MNIST on  $\ell_2$  ( $\epsilon = 1.5$ ) and  $\ell_\infty$  ( $\epsilon = 0.1$ ) compared to a Vanilla CNN.



### G Example images for additive Gaussian noise

Example images with additive Gaussian noise of varying standard deviation  $\sigma$  are displayed in Fig. 3. The considered  $\sigma$ -levels correspond to those studied in section 4.2. in the main paper.

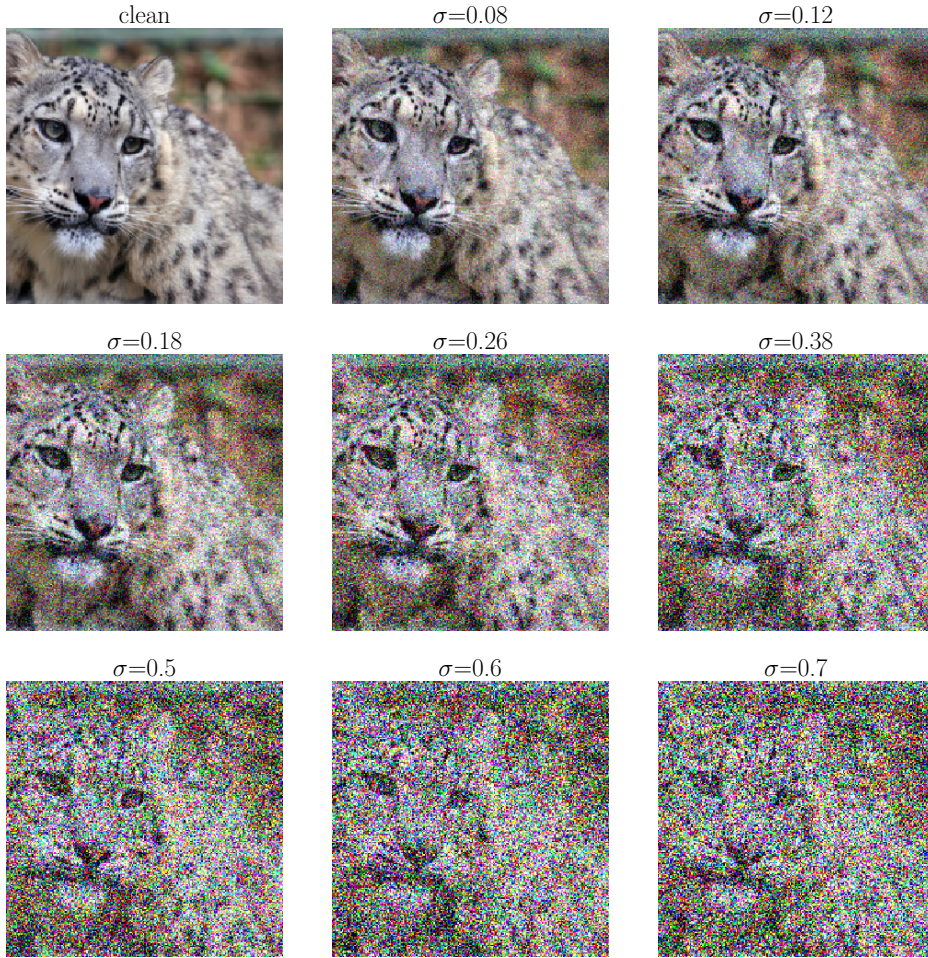

Fig. 3: Example images with different  $\sigma$ -levels of additive Gaussian noise on ImageNet.

## H Comparison to Ford et al.

Ford et al. trained an InceptionV3 model from scratch both on clean data from the ImageNet dataset and on data augmented with Gaussian noise [1]. Since we use a very similar approach, we compare our approach to theirs directly. The results for comparison on ImageNet both for the vanilla and the Gaussian noise trained model can be found in Table 8. Since we use a pretrained model provided by PyTorch and fine-tune it instead of training a new one, the performance of our vanilla trained model differs from the performance of their vanilla trained model, both on clean data and on ImageNet-C. The accuracy on clean data is displayed in Table 9. Another difference between our training and theirs is that we split every batch evenly in clean and data augmented by Gaussian noise with one standard deviation whereas they sample  $\sigma$  uniformly between 0 and one specific value. With our training scheme, we were able to outperform their model significantly on all corruptions except for Elastic, Fog and Brightness.

| model                           | All         | Noise (Compressed) |             |             | Blur (Compressed) |             |             |             |
|---------------------------------|-------------|--------------------|-------------|-------------|-------------------|-------------|-------------|-------------|
|                                 |             | Gaussian           | Shot        | Impulse     | Defocus           | Glass       | Motion      | Zoom        |
| Vanilla InceptionV3 [1]         | 38.8        | 36.6               | 34.3        | 34.7        | 31.1              | 19.3        | 35.3        | 30.1        |
| Gaussian ( $\sigma = 0.4$ ) [1] | 42.7        | 40.3               | 38.8        | 37.7        | 32.9              | 29.8        | 35.3        | 33.1        |
| Vanilla InceptionV3 [ours]      | 41.6        | 42.0               | 40.3        | 38.5        | 33.5              | 27.1        | 36.1        | 28.8        |
| GNT $\sigma_{0.4}$ [ours]       | 49.5        | 60.8               | 59.6        | 59.4        | 43.8              | 37.0        | 42.8        | 38.4        |
| GNT $\sigma_{0.5}$ [ours]       | <b>50.2</b> | <b>61.6</b>        | <b>60.9</b> | <b>60.8</b> | <b>44.6</b>       | <b>37.3</b> | <b>44.0</b> | <b>39.3</b> |

  

| model                           | Weather (Compressed) |             |             |             | Digital (Compressed) |             |             |             |
|---------------------------------|----------------------|-------------|-------------|-------------|----------------------|-------------|-------------|-------------|
|                                 | Snow                 | Frost       | Fog         | Brightness  | Contrast             | Elastic     | Pixelate    | JPEG        |
| Vanilla InceptionV3 [1]         | 33.1                 | 34.0        | 52.4        | 66.0        | 35.9                 | 47.8        | 38.2        | 50.0        |
| Gaussian ( $\sigma = 0.4$ ) [1] | 36.6                 | 43.5        | <b>52.3</b> | <b>67.1</b> | 35.8                 | <b>52.2</b> | 47.0        | 55.5        |
| Vanilla InceptionV3 [ours]      | 33.5                 | 39.6        | 42.2        | 64.2        | 41.0                 | 43.5        | 57.4        | 56.9        |
| GNT $\sigma_{0.4}$ [ours]       | 35.6                 | 43.7        | 43.3        | 64.8        | 43.0                 | 49.0        | 59.3        | 61.7        |
| GNT $\sigma_{0.5}$ [ours]       | <b>37.1</b>          | <b>44.2</b> | 43.6        | 64.6        | <b>43.3</b>          | 49.4        | <b>59.6</b> | <b>61.9</b> |

Table 8: ImageNet-C accuracy for InceptionV3.

| model                           | clean accuracy [%] |
|---------------------------------|--------------------|
| Vanilla InceptionV3 [1]         | 75.9               |
| Gaussian ( $\sigma = 0.4$ ) [1] | 74.2               |
| Vanilla InceptionV3 [ours]      | 77.2               |
| GNT $\sigma_{0.4}$ [ours]       | 78.1               |
| GNT $\sigma_{0.5}$ [ours]       | 77.9               |

Table 9: Accuracy on clean data for differently trained models.

## I Visualization of images with different perturbation sizes

In the main paper, we measure model robustness by calculating the median perturbation size  $\epsilon^*$  and report the results in Table 2. To provide a better intuition for the noise level in an image for a particular  $\epsilon^*$ , we display example images in Fig. 4.

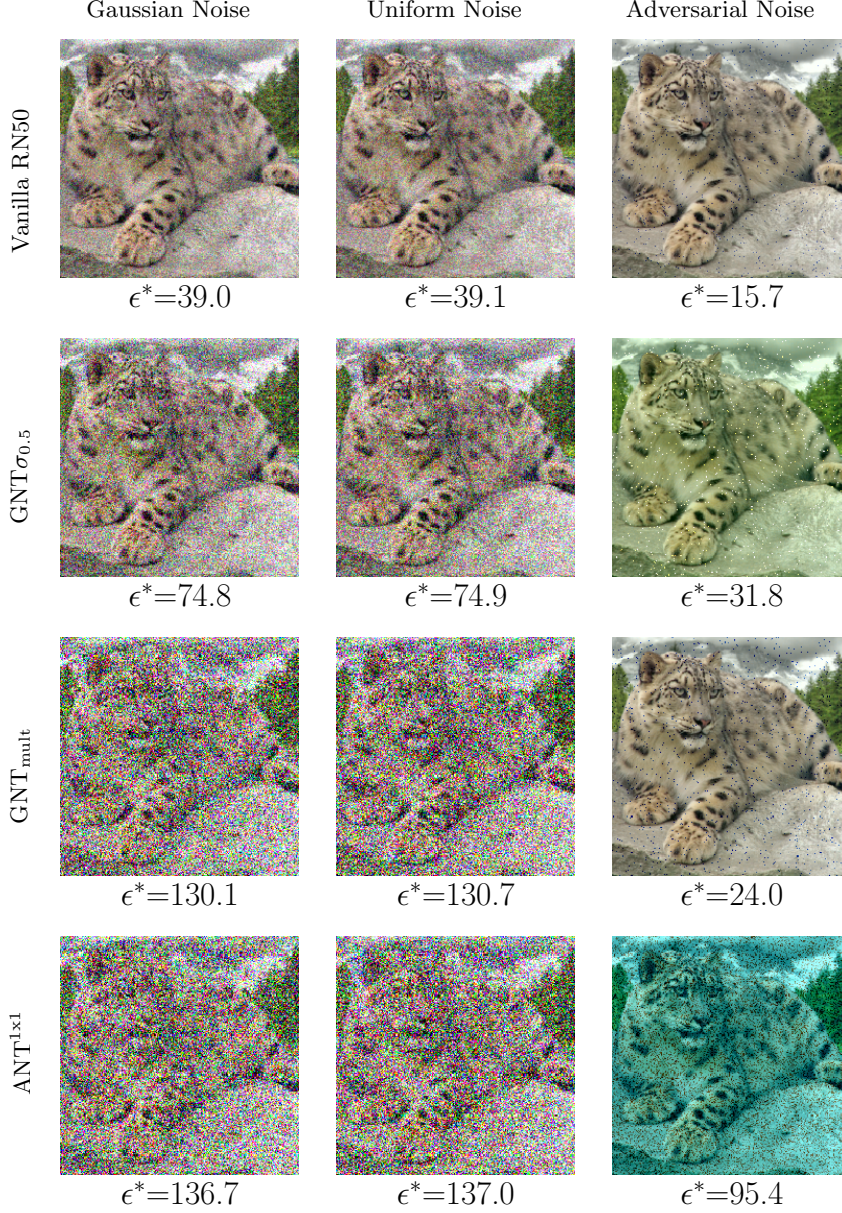

Fig. 4: Example images for the different perturbation sizes  $\epsilon^*$  and different noise types on ImageNet corresponding to the  $\epsilon^*$  values in Table 2 in the main paper.



## J Visualization of Posterize vs JPEG

AugMix [4] uses Posterize as one of their operations for data augmentation during training. In Fig. 5, we show the visual similarity between the Posterize operation and the JPEG corruption from ImageNet-C.

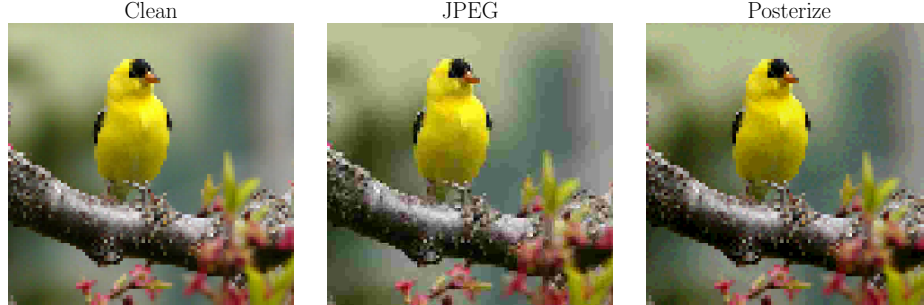

Fig. 5: Example images for the JPEG compression from ImageNet-C and the `PIL.ImageOps.Posterize` operation.

## K Additional results

**Adversarial Noise Training with a DenseNet121 architecture** To test in how far our results generalize to other backbones, we have trained a DenseNet121 model with  $\text{ANT}^{1 \times 1}$ . The DenseNet121 model was finetuned from the checkpoint provided by torchvision. A DenseNet121 has  $7.97886 \cdot 10^6$  trainable parameters whereas a ResNet50 has  $2.5557 \cdot 10^7$ . Our results and a comparison to  $\text{ANT}^{1 \times 1}$  with a ResNet50 model is shown in Table 10:  $\text{ANT}^{1 \times 1}$  increases robustness on full ImageNet-C and ImageNet-C without noises for the DenseNet121 model, showing that adversarial noise training generalizes to other backbones.

| model                           | IN         | IN-C   |        | IN-C w/o noises |       |
|---------------------------------|------------|--------|--------|-----------------|-------|
|                                 | clean acc. | Top-1  | Top-5  | Top-1           | Top-5 |
| Vanilla RN50                    | 76.1       | 39.2   | 59.3   | 42.3            | 63.2  |
| $\text{ANT}^{1 \times 1}$ RN50  | 76.0       | (51.1) | (72.2) | 47.7            | 68.8  |
| Vanilla DN121                   | 74.4       | 42.1   | 63.4   | 44.0            | 65.5  |
| $\text{ANT}^{1 \times 1}$ DN121 | 74.3       | 50.3   | 71.6   | 46.8            | 68.3  |

Table 10: Average accuracy on clean data, average Top-1 and Top-5 accuracies on full ImageNet-C and ImageNet-C without the noise category (higher is better); all values in percent. We compare the results obtained by  $\text{ANT}^{1 \times 1}$  for a ResNet50 (RN50) architecture to a DenseNet121 (DN121) architecture.

**Results for different parameter counts of the noise generator** Here, we study the effect of different parameter counts of the adversarial noise generator on  $\text{ANT}^{1 \times 1}$ . We provide the results in Table 11. We indicate the depth of the noise generator with a subscript. All experiments in this paper apart from this ablation study were performed with a default depth of 4 layers. We observe that while depth is a tunable hyper-parameter, the performances of  $\text{ANT}^{1 \times 1}$  with the studied noise generators do not differ by a lot. Only the most shallow noise generator with a depth of one layer and only 12 trainable parameters results in a roughly 1% lower accuracy than its deeper counterparts. We note that a  $\text{GNT}_{\sigma_{0.5}}$  model has an accuracy of 49.4% on full ImageNet-C and an accuracy of 47.1% on ImageNet-C without noises which roughly corresponds to the respective accuracies of  $\text{ANT}^{1 \times 1}$  with the most shallow noise generator.

| model                                          | Number of<br>parameters | IN<br>clean acc. | IN-C<br>Top-1 | IN-C w/o noises<br>Top-1 |
|------------------------------------------------|-------------------------|------------------|---------------|--------------------------|
| Vanilla RN50                                   | -                       | 76.1             | 39.2          | 42.3                     |
| $\text{ANT}^{1 \times 1}$ RN50 NG <sub>1</sub> | 12                      | 75.1             | (49.5)        | 46.6                     |
| $\text{ANT}^{1 \times 1}$ RN50 NG <sub>2</sub> | 143                     | 75.5             | (50.8)        | 47.2                     |
| $\text{ANT}^{1 \times 1}$ RN50 NG <sub>3</sub> | 563                     | 75.3             | (50.7)        | 47.2                     |
| $\text{ANT}^{1 \times 1}$ RN50 NG <sub>4</sub> | 983                     | 76.0             | (51.1)        | 47.7                     |
| $\text{ANT}^{1 \times 1}$ RN50 NG <sub>5</sub> | 1403                    | 74.0             | (50.7)        | 47.0                     |

Table 11: Number of trainable parameters of different noise generators, average accuracy on clean data, ImageNet-C and ImageNet-C without the noise category (higher is better); all values in percent. We compare the results obtained by  $\text{ANT}^{1 \times 1}$  with noise generators of different depth. Note that a depth of 4 layers was used in all experiments in this paper apart from this ablation study.

## References

1. Ford, N., Gilmer, J., Carlini, N., Cubuk, D.: Adversarial examples are a natural consequence of test error in noise. ICML (2019)
2. Geirhos, R., Rubisch, P., Michaelis, C., Bethge, M., Wichmann, F.A., Brendel, W.: Imagenet-trained CNNs are biased towards texture; increasing shape bias improves accuracy and robustness. In: International Conference on Learning Representations (2019), <https://openreview.net/forum?id=Bygh9j09KX>
3. Hendrycks, D., Dietterich, T.: Benchmarking neural network robustness to common corruptions and perturbations. In: International Conference on Learning Representations (2019), <https://openreview.net/forum?id=HJz6tiCqYm>
4. Hendrycks, D., Mu, N., Cubuk, E.D., Zoph, B., Gilmer, J., Lakshminarayanan, B.: Augmix: A simple data processing method to improve robustness and uncertainty. In: International Conference on Learning Representations (2020), <https://openreview.net/forum?id=S1gmrxFvB>
5. Kingma, D.P., Ba, J.: Adam: A method for stochastic optimization. arXiv preprint arXiv:1412.6980 (2014)
6. Madry, A., Makelov, A., Schmidt, L., Tsipras, D., Vladu, A.: Towards deep learning models resistant to adversarial attacks. arXiv preprint arXiv:1706.06083 (2017)
7. Paszke, A., Gross, S., Chintala, S., Chanan, G., Yang, E., DeVito, Z., Lin, Z., Desmaison, A., Antiga, L., Lerer, A.: Automatic differentiation in PyTorch. In: NIPS Autodiff Workshop (2017)
8. Rony, J., Hafemann, L.G., Oliveira, L.S., Ayed, I.B., Sabourin, R., Granger, E.: Decoupling direction and norm for efficient gradient-based l2 adversarial attacks and defenses. In: Proceedings of the IEEE Conference on Computer Vision and Pattern Recognition. pp. 4322–4330 (2019)
9. Shafahi, A., Najibi, M., Ghiasi, A., Xu, Z., Dickerson, J., Studer, C., Davis, L.S., Taylor, G., Goldstein, T.: Adversarial training for free! arXiv preprint arXiv:1904.12843 (2019)
10. Shafahi, A., Najibi, M., Xu, Z., Dickerson, J.P., Davis, L.S., Goldstein, T.: Universal adversarial training. CoRR **abs/1811.11304** (2018), <http://arxiv.org/abs/1811.11304>
11. Wong, E., Schmidt, F.R., Metzen, J.H., Kolter, J.Z.: Scaling provable adversarial defenses. CoRR **abs/1805.12514** (2018), <http://arxiv.org/abs/1805.12514>
12. Xie, C., Wu, Y., van der Maaten, L., Yuille, A.L., He, K.: Feature denoising for improving adversarial robustness. CVPR (2019)
